# Supplementary material
Source: PubMed Central journal article supplement (PMC5007193)

# Supplementary Figure 9

**A** Figure 1f

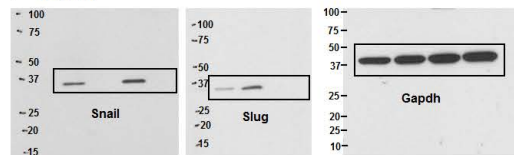

**B** Figure 1j

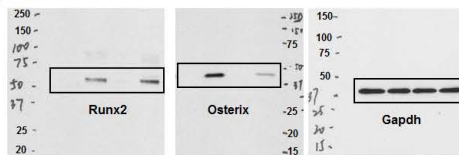

**C** Figure 3i

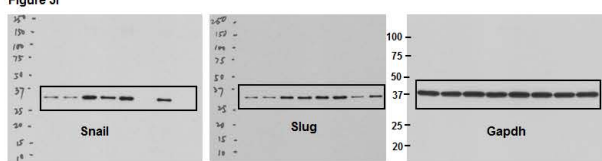

**D** Figure 4a

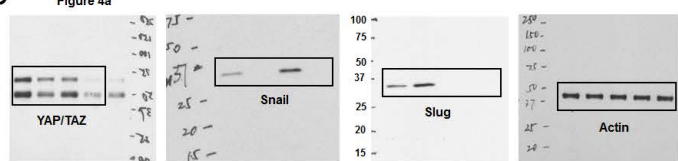

**E** Figure 4c

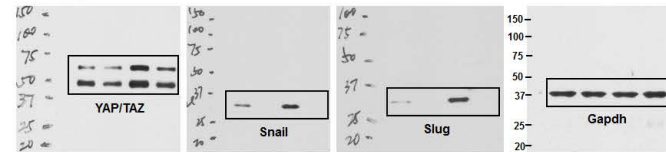

**F** Figure 4d

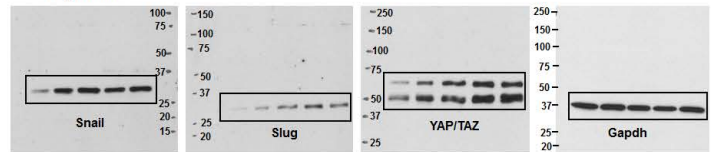

**G** Figure 4e

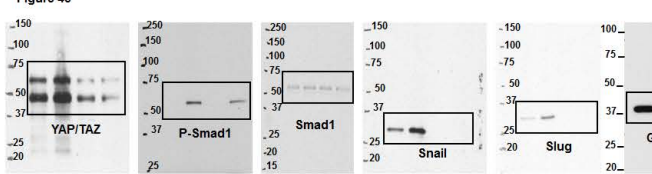

**H** Figure 4f

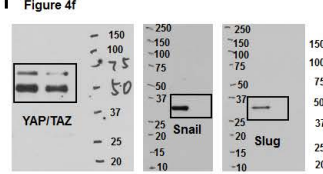

**I** Figure 4g

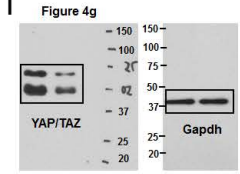

**J** Figure 5a

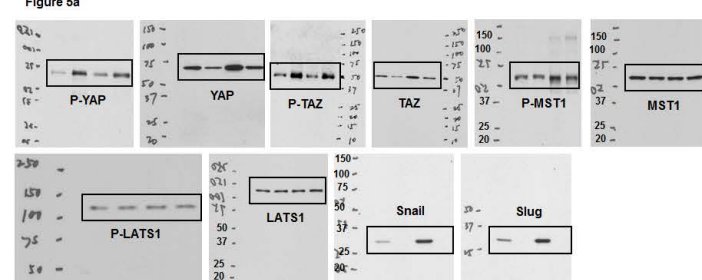

**K** Figure 5b

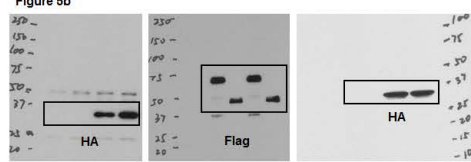

**L** Figure 5c

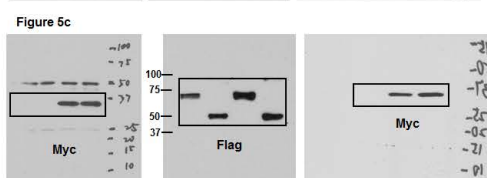

**M** Figure 5d

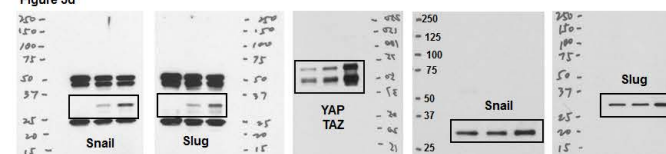

**N** Figure 5e

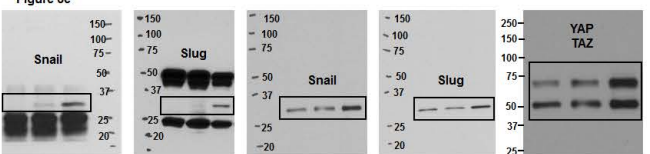

**O** Figure 6b

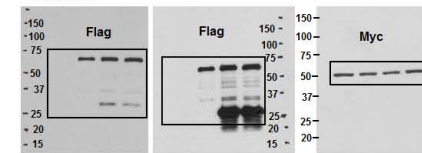

**P** Figure 6d

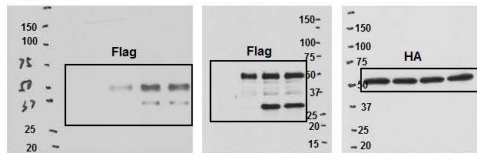

**Q** Figure 6f

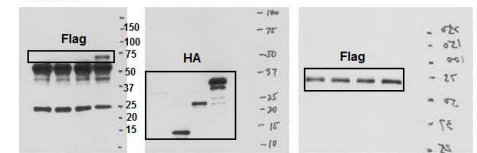

**R** Figure 6g

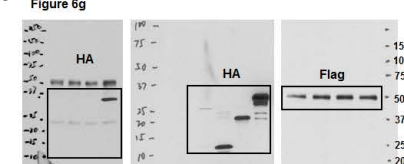

**S** Figure 8e

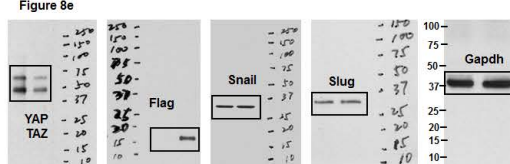

# Supplementary Figure 9 continued

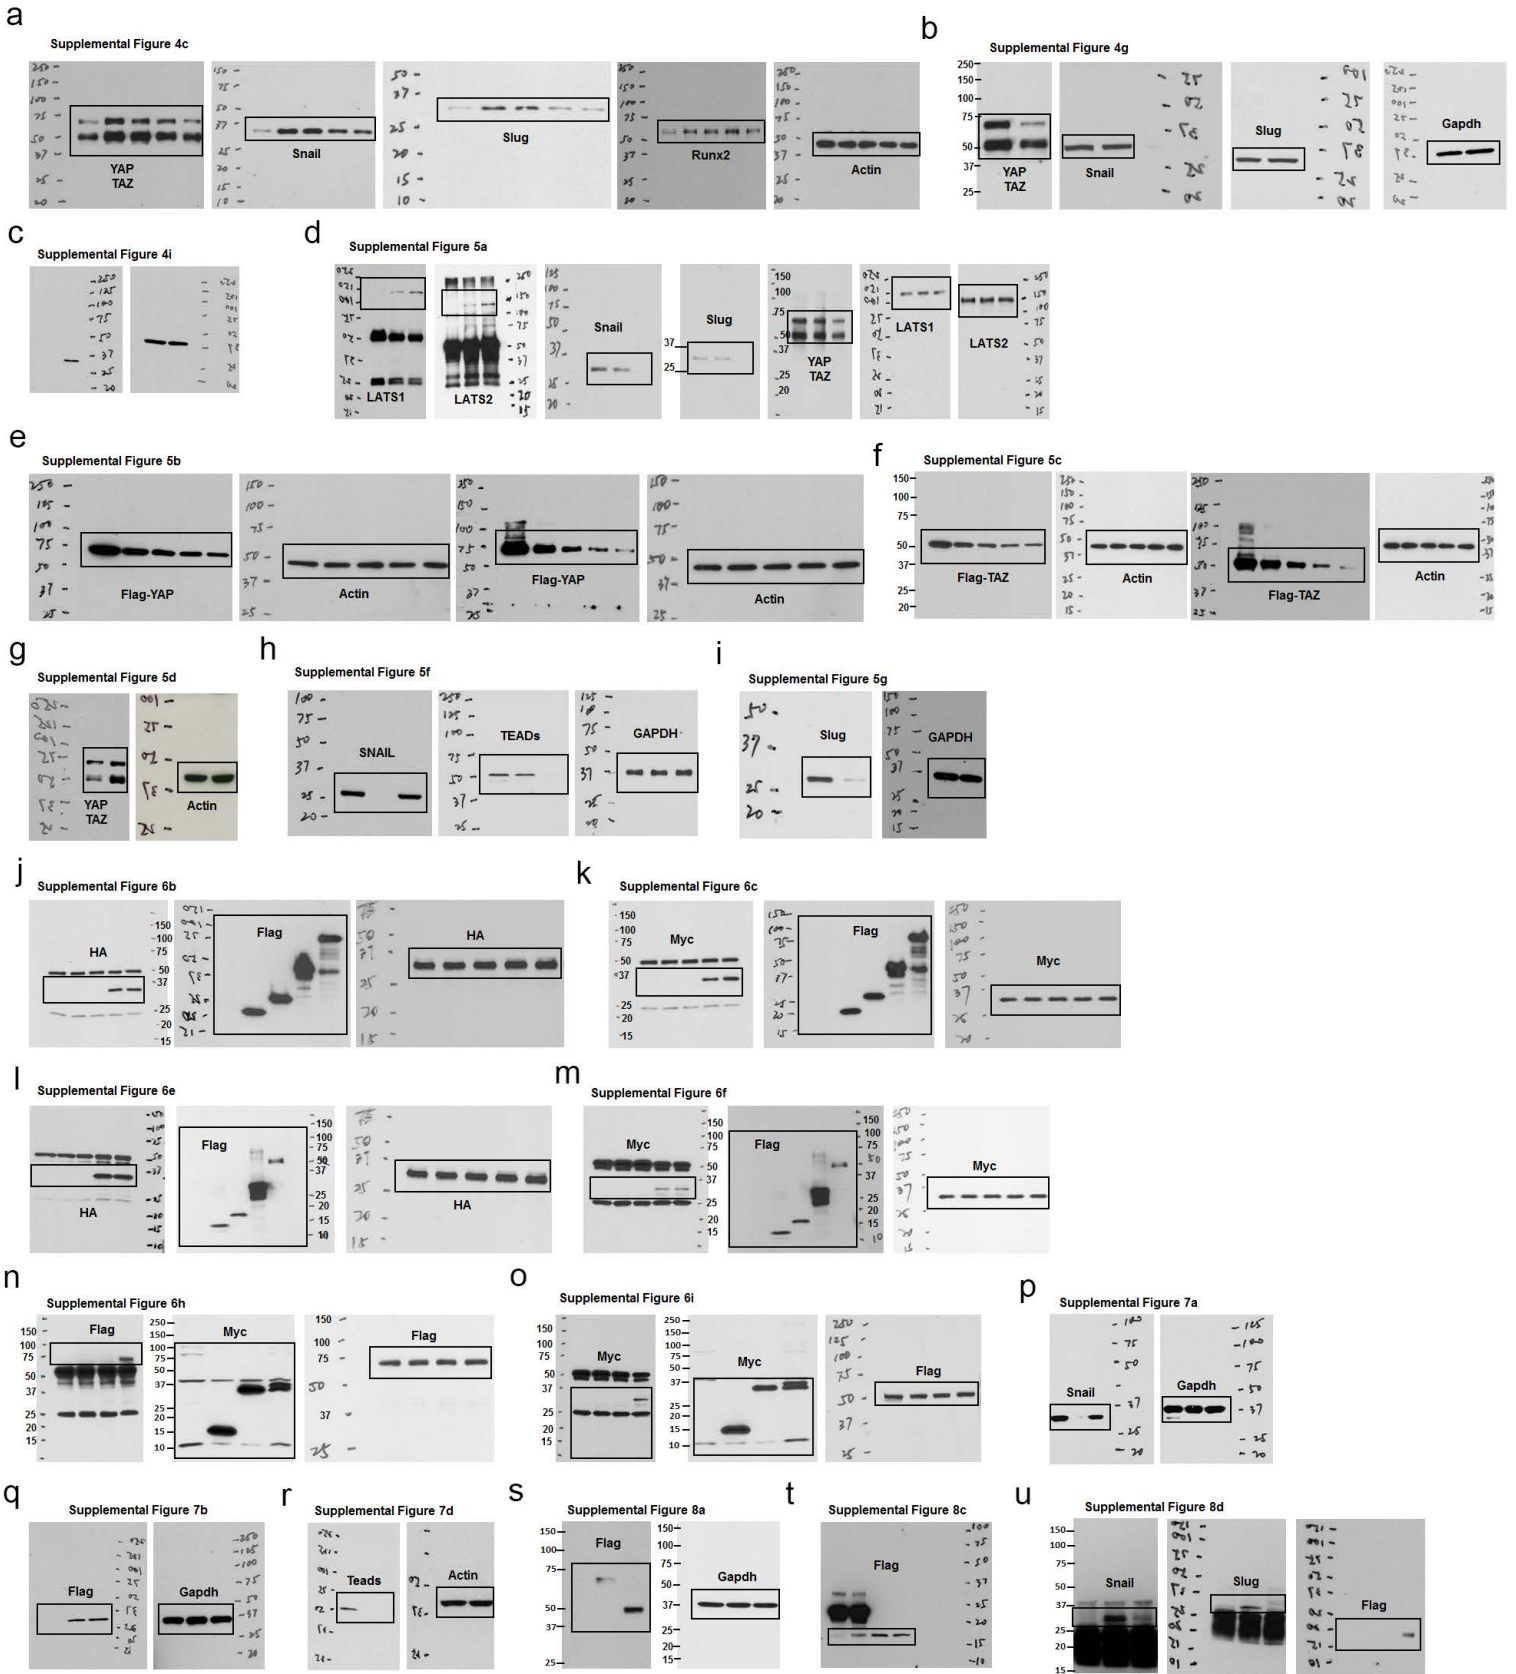

Supplement: NIHMS800479-supplement-10.pdf [file NIHMS800479-supplement-10.pdf]
